# Supplementary material for: Mitochondrial-derived peptides, HNG and SHLP3, protect cochlear hair cells against gentamicin
Source: PubMed Central journal article supplement (PMC11493991; doi:10.1038/s41420-024-02215-9), 2024-10-21

Figure S3

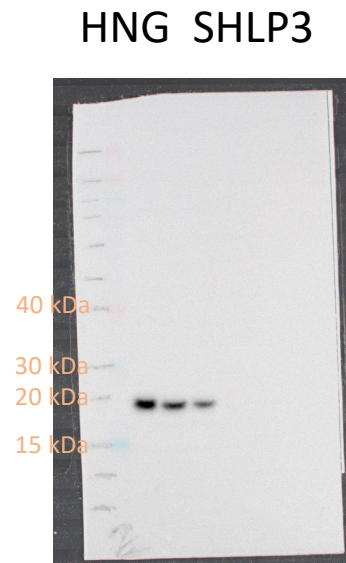

BAX

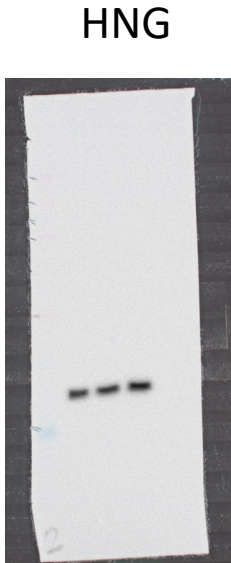

BAX

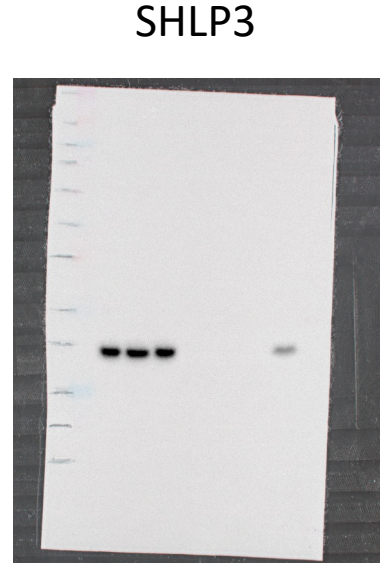

BAX

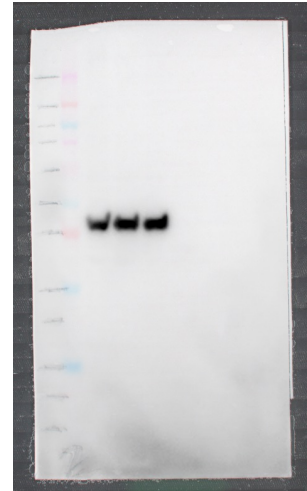

$\beta$ -actin

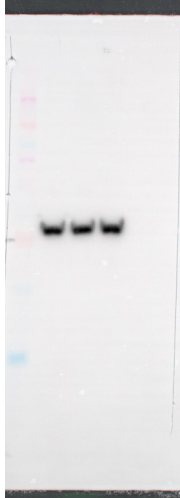

$\beta$ -actin

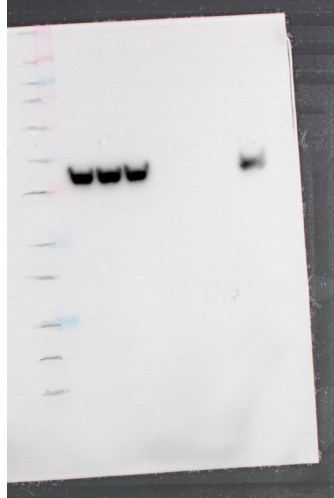

$\beta$ -actin

Figure S4

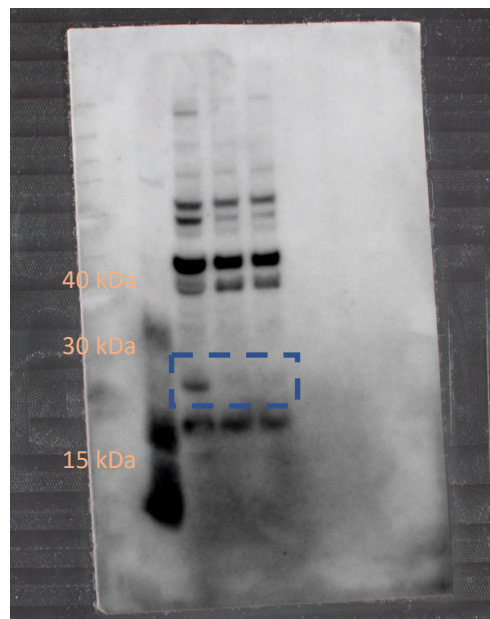

Rattin (Novus biologicals), predicted 25 kDa

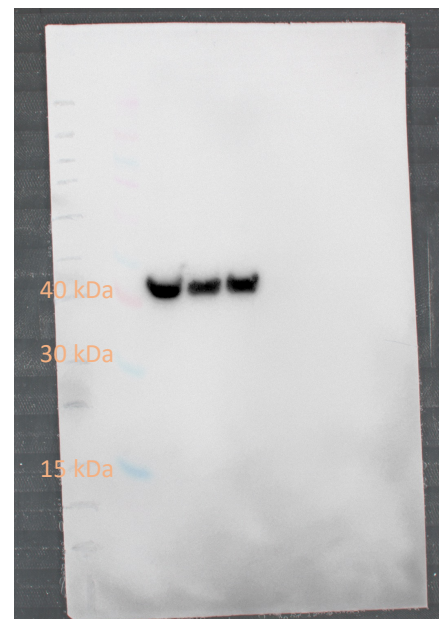

$\beta$ -actin

Figure S5

HNG

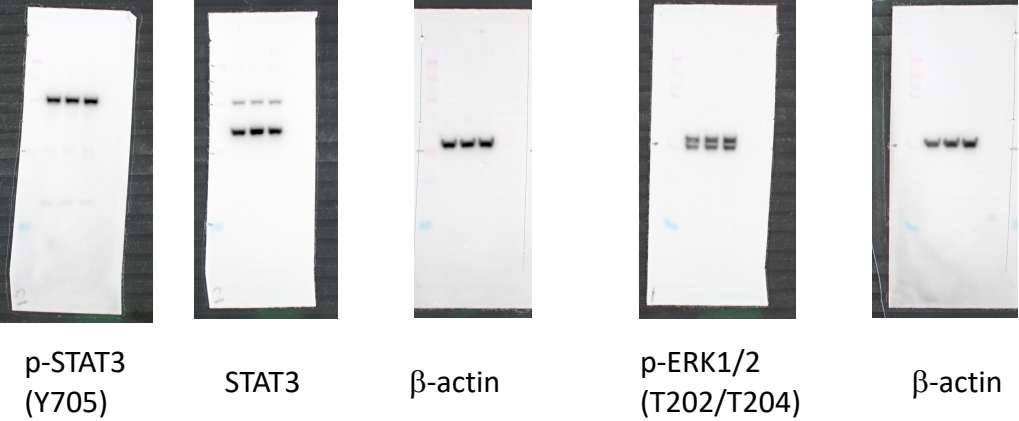

p-STAT3  
(Y705)

STAT3

$\beta$ -actin

p-ERK1/2  
(T202/T204)

$\beta$ -actin

SHLP3

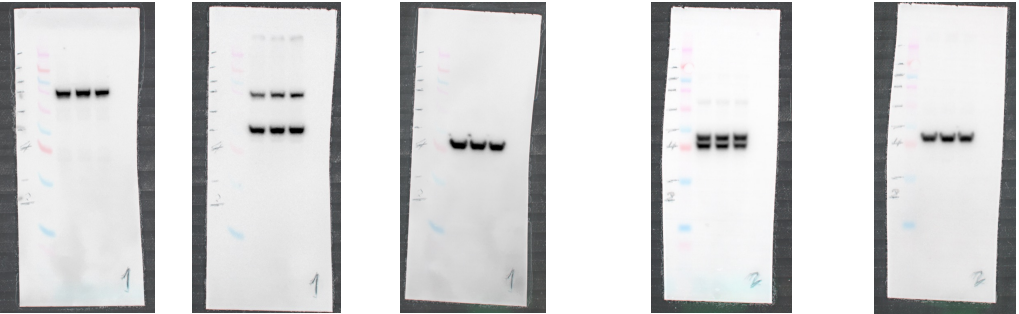

p-STAT3  
(Y705)

STAT3

$\beta$ -actin

p-ERK1/2  
(T202/T204)

$\beta$ -actin

Figure S6

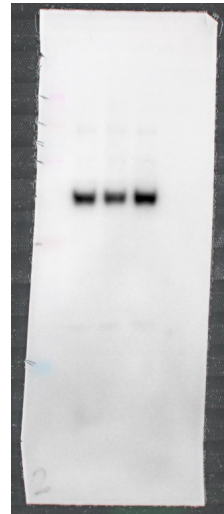

p-AKT  
(S473)

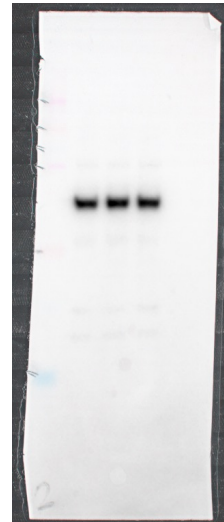

AKT

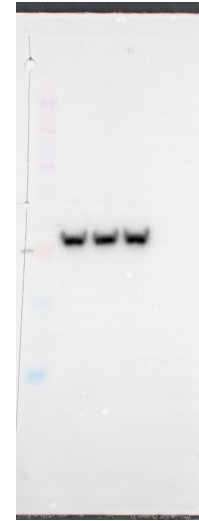

$\beta$ -actin

Figure S7

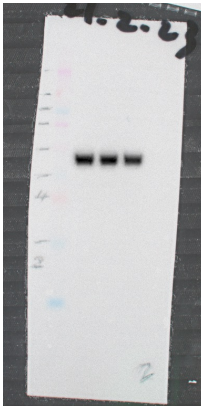

p-AKT  
(S473)

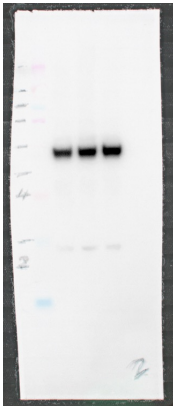

AKT

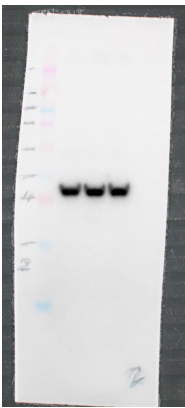

$\beta$ -actin

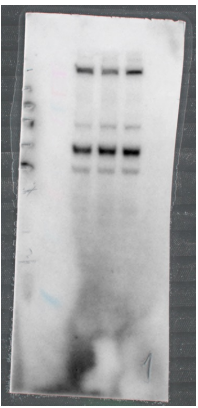

p-AMPK $\alpha$   
(T172)

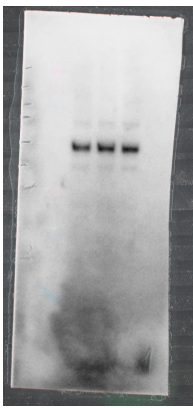

AMPK $\alpha$

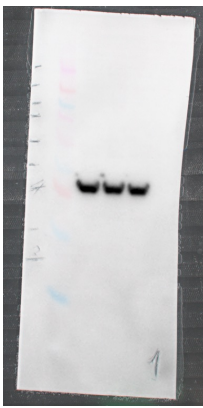

$\beta$ -actin

Figure S8

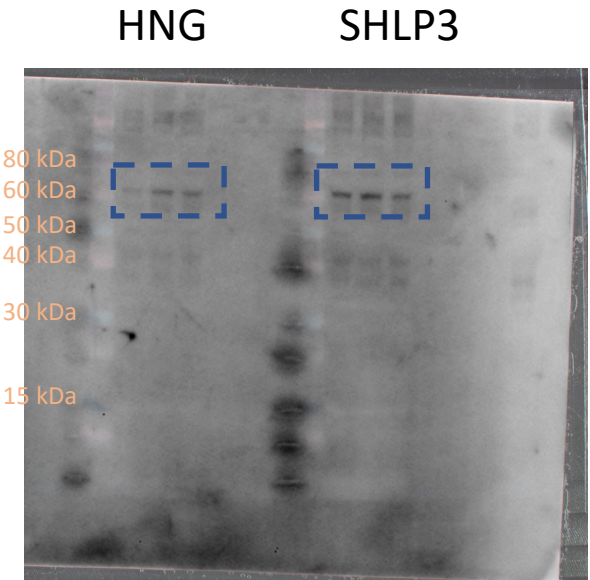

4-HNE (Abcam),  
predicted 65, 70, 100 kDa

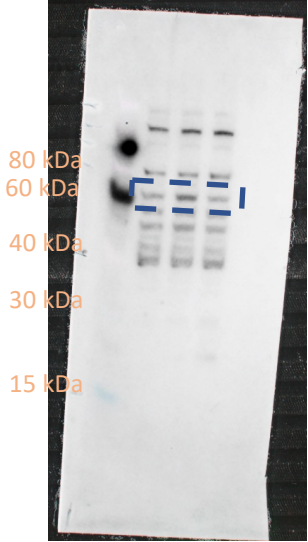

HNG

NRF2 (Bioss Inc),  
predicted 66 kDa

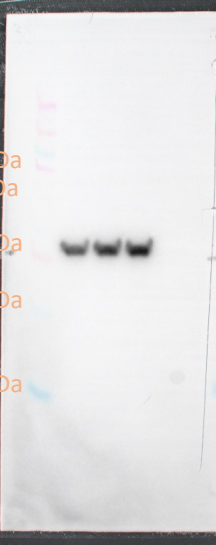

$\beta$ -actin

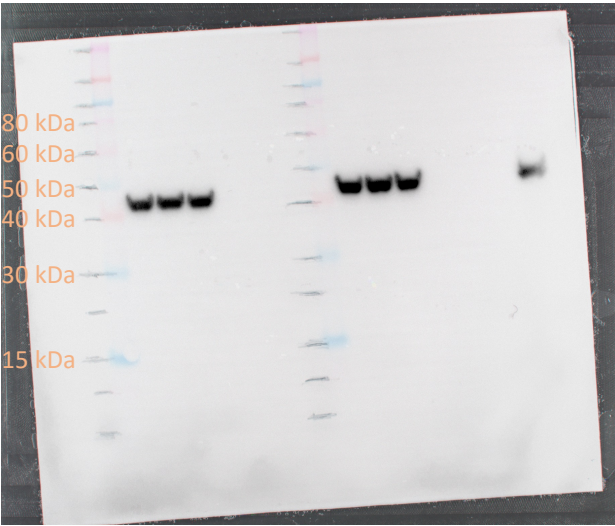

$\beta$ -actin

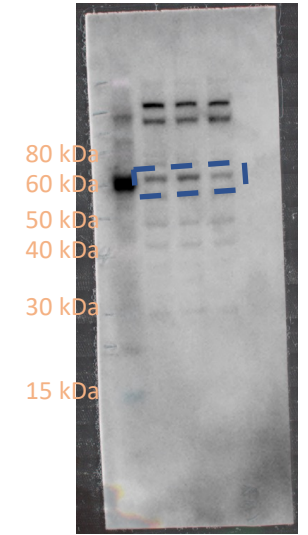

SHLP3

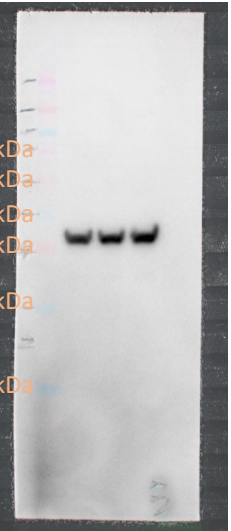

Supplement: 41420_2024_2215_MOESM5_ESM.pdf [file 41420_2024_2215_MOESM5_ESM.pdf]
